# Supplementary material for: Effect of temporary housing on incidence of diabetes mellitus in survivors of a tsunami-stricken area in 2011 Japan disaster: a serial cross-sectional RIAS study
Source: PubMed Central journal article supplement (PMC7505964; doi:10.1038/s41598-020-71759-4), 2020-09-21
Supplement: 41598_2020_71759_MOESM1_ESM.pdf [file 41598_2020_71759_MOESM1_ESM.pdf]

## Supplementary Materials

Effect of temporary housing on incidence of diabetes mellitus in survivors of a tsunami-stricken area in 2011 Japan disaster:  
A serial cross-sectional RIAS study

Shuko Takahashi; Kozo Tanno; Yuki Yonekura; Haruki Shimoda; Ryohei Sasaki; Kiyomi Sakata; Akira Ogawa; Seiichiro Kobayashi

Correspondence to: [shutakahashi-iwt@umin.ac.jp](mailto:shutakahashi-iwt@umin.ac.jp)

Supplementary Table S1.

- (A) Baseline characteristics of men in the 2011 survey stratified by age classes (n=2,697).
- (B) Baseline characteristics of women in the 2011 survey stratified by age classes (n=4,794).

Supplementary Table S2.

- (A) Odds ratios of the incidence of diabetes mellitus for men in discrete-time logit models excluding DM events in the 2012 and 2013 survey.
- (B) Odds ratios of the incidence of diabetes mellitus for women in discrete-time logit models excluding DM events in the 2012 and 2013 survey.

Supplementary Table S3.

- (A) Odds ratios of the incidence of diabetes mellitus for men in discrete-time logit models for all cases.
- (B) Odds ratios of the incidence of diabetes mellitus for women in discrete-time logit models for all cases.

Supplementary Table S4.

- (A) Odds ratios of the incidence of diabetes mellitus diagnosed two times during surveys for men in discrete-time logit models stratified age classes.
- (B) Odds ratios of the incidence of diabetes mellitus diagnosed two times during surveys for women in discrete-time logit models stratified age classes.

Supplementary Table S5.

- (A) Baseline characteristics of participants in the 2012 survey (n=7,491).
- (B) Baseline characteristics of participants in the 2013 survey (n=7,491).

(C) Baseline characteristics of participants in the 2014 survey (n=7,491).

(D) Baseline characteristics of participants in the 2015 survey (n=7,491).

Supplementary Table S6.

The number of participants and the number of events in categorical variables.

1 Supplementary Table S1 (A). Baseline characteristics of men in the 2011 survey stratified by age classes (n=2,697)  
2

| Men                          |                                  | 64 years or younger (n=1245) |                     |                            |                   | 65 years or older (n=1452) |                     |                             |                   |
|------------------------------|----------------------------------|------------------------------|---------------------|----------------------------|-------------------|----------------------------|---------------------|-----------------------------|-------------------|
|                              |                                  | Missing                      | TH group<br>(n=425) | Non-TH<br>group<br>(n=820) |                   | Missing                    | TH group<br>(n=428) | Non-TH<br>group<br>(n=1024) |                   |
|                              |                                  | n (%)                        | Mean<br>(SD)        | Mean (SD)                  | <i>P</i><br>Value | n (%)                      | Mean<br>(SD)        | Mean (SD)                   | <i>P</i><br>Value |
| Age                          | Age (yr)                         | 0 (0.0)                      | 51.1 (10.2)         | 51.8 (11.3)                | 0.288             | 0 (0.0)                    | 72.7 (5.2)          | 73.1 (5.4)                  | 0.118             |
| Disaster-related experiences | Death of family members          | 335<br>(26.9)                | 57 (18.7)           | 47 (7.8)                   | <0.001            | 350<br>(28.1)              | 43 (13.0)           | 47 (6.1)                    | <0.001            |
| Marital status               | Single (2015)                    | 338<br>(27.1)                | 122 (40.1)          | 164 (27.2)                 | <0.001            | 353<br>(28.4)              | 65 (19.6)           | 89 (11.6)                   | <0.001            |
| Life style                   | Current smokers                  | 0 (0.0)                      | 202 (47.5)          | 315 (38.4)                 | 0.002             | 0 (0.0)                    | 82 (19.2)           | 183 (17.9)                  | 0.562             |
|                              | Drinkers                         | 0 (0.0)                      | 295 (69.4)          | 558 (68.0)                 | 0.623             | 0 (0.0)                    | 267 (62.4)          | 617 (60.3)                  | 0.448             |
|                              | Low physical activity            | 5 (0.4)                      | 261 (61.4)          | 465 (57.1)                 | 0.139             | 9 (0.7)                    | 291 (68.5)          | 605 (59.4)                  | 0.001             |
|                              | Small number of meals (<3 times) | 5 (0.4)                      | 63 (14.9)           | 84 (10.3)                  | 0.017             | 14 (1.1)                   | 17 (4.0)            | 17 (1.7)                    | 0.007             |
| Socioeconomic status         | Poor dietary intake              | 0 (0.0)                      | 228 (53.6)          | 383 (46.7)                 | 0.020             | 0 (0.0)                    | 174 (40.7)          | 346 (33.8)                  | 0.013             |
|                              | Severe economic status           | 2 (0.2)                      | 298 (70.4)          | 500 (61.0)                 | 0.001             | 7 (0.6)                    | 245 (57.9)          | 378 (37.0)                  | <0.001            |
|                              | Unemployment (2015)              | 355<br>(28.5)                | 76 (25.7)           | 132 (22.2)                 | 0.251             | 355<br>(28.5)              | 246 (74.5)          | 569 (74.2)                  | 0.900             |
| Psychological factors        | Psychological distress           | 9 (0.7)                      | 184 (43.6)          | 336 (41.3)                 | 0.433             | 18 (1.4)                   | 162 (38.4)          | 287 (28.4)                  | <0.001            |
|                              | Insomnia                         | 10 (0.8)                     | 148 (35.2)          | 230 (28.3)                 | 0.013             | 19 (1.5)                   | 122 (28.8)          | 182 (18.0)                  | <0.001            |
| Social factors               | Low level of social network      | 16 (1.3)                     | 182 (43.5)          | 379 (46.7)                 | 0.287             | 40 (3.2)                   | 162 (38.6)          | 388 (39.1)                  | 0.849             |
|                              | Low level of social capital      | 2 (0.2)                      | 53 (12.5)           | 93 (11.4)                  | 0.567             | 4 (0.3)                    | 39 (9.2)            | 100 (9.8)                   | 0.711             |
| Cardiovascular risk factors  | Obesity                          | 0 (0.0)                      | 158 (37.2)          | 309 (37.7)                 | 0.861             | 0 (0.0)                    | 145 (33.9)          | 369 (36.0)                  | 0.433             |
|                              | Hypertension                     | 0 (0.0)                      | 155 (36.5)          | 304 (37.1)                 | 0.834             | 0 (0.0)                    | 259 (60.5)          | 637 (62.2)                  | 0.545             |
|                              | Dyslipidemia                     | 0 (0.0)                      | 166 (39.1)          | 303 (37.0)                 | 0.467             | 0 (0.0)                    | 141 (32.9)          | 295 (28.8)                  | 0.117             |

- 3 Continuous variables indicate mean (standard deviation), categorical variables indicate the number of case (%).
- 4 P Values were calculated using the Student t tests for continuous variables and the Chi square test for categorical variables.
- 5 Abbreviations: non-TH, non-temporary housing group; TH, temporary housing group; SD, standard deviation.

6 Supplementary Table S1 (B). Baseline characteristics of women in the 2011 survey stratified by age classes (n=4,794)

7

| Women                           |                                     | 64 years or younger (n=2666) |                     |                             |                   | 65 years or older (n=2128) |                     |                             |                   |
|---------------------------------|-------------------------------------|------------------------------|---------------------|-----------------------------|-------------------|----------------------------|---------------------|-----------------------------|-------------------|
|                                 |                                     | Missing                      | TH group<br>(n=835) | Non-TH<br>group<br>(n=1831) |                   | Missing                    | TH group<br>(n=684) | Non-TH<br>group<br>(n=1444) |                   |
|                                 |                                     | n (%)                        | Mean<br>(SD)        | Mean (SD)                   | <i>P</i><br>Value | n (%)                      | Mean<br>(SD)        | Mean (SD)                   | <i>P</i><br>Value |
| Age                             | Age (yr)                            | 0 (0.0)                      | 50.2 (11.3)         | 51.8 (10.7)                 | <0.001            | 0 (0.0)                    | 72.6 (5.3)          | 72.4 (5.2)                  | 0.418             |
| Disaster-related<br>experiences | Death of family members             | 600<br>(48.2)                | 94 (14.8)           | 89 (6.2)                    | <0.001            | 479<br>(38.5)              | 85.0 (0.2)          | 65.0 (0.1)                  | <0.001            |
| Marital status                  | Single (2015)                       | 600<br>(48.2)                | 168 (26.3)          | 316 (22.1)                  | 0.037             | 479<br>(38.5)              | 272.0 (0.5)         | 437.0 (0.4)                 | <0.001            |
| Life style                      | Current smokers                     | 0 (0.0)                      | 104 (12.5)          | 180 (9.8)                   | 0.042             | 0 (0.0)                    | 13.0 (0.0)          | 12.0 (0.0)                  | 0.032             |
|                                 | Drinkers                            | 0 (0.0)                      | 195 (23.4)          | 350 (19.1)                  | 0.012             | 0 (0.0)                    | 44.0 (0.1)          | 91.0 (0.1)                  | 0.908             |
|                                 | Low physical activity               | 17 (1.4)                     | 581 (69.7)          | 1198 (66.0)                 | 0.055             | 21 (1.7)                   | 502.0 (0.7)         | 952.0 (0.7)                 | 0.001             |
|                                 | Small number of meals<br>(<3 times) | 6 (0.5)                      | 81 (9.7)            | 131 (7.2)                   | 0.024             | 19 (1.5)                   | 11.0 (0.0)          | 17.0 (0.0)                  | 0.409             |
|                                 | Poor dietary intake                 | 0 (0.0)                      | 335 (40.1)          | 605 (33.0)                  | <0.001            | 0 (0.0)                    | 183.0 (0.3)         | 390.0 (0.3)                 | 0.902             |
| Socioeconomic<br>status         | Severe economic status              | 2 (0.2)                      | 511 (61.3)          | 992 (54.2)                  | 0.001             | 9 (0.7)                    | 391.0 (0.6)         | 526.0 (0.4)                 | <0.001            |
|                                 | Unemployment (2015)                 | 621<br>(49.9)                | 277 (43.8)          | 708 (50.1)                  | 0.009             | 484<br>(38.9)              | 483.0 (0.9)         | 957.0 (0.9)                 | 0.111             |
| Psychological<br>factors        | Psychological distress              | 41 (3.3)                     | 454 (55.3)          | 845 (46.8)                  | <0.001            | 60 (4.8)                   | 325.0 (0.5)         | 575.0 (0.4)                 | <0.001            |
|                                 | Insomnia                            | 33 (2.7)                     | 357 (43.2)          | 658 (36.4)                  | 0.001             | 45 (3.6)                   | 315.0 (0.5)         | 484.0 (0.3)                 | <0.001            |
| Social factors                  | Low level of social<br>network      | 46 (3.7)                     | 345 (42.3)          | 804 (44.6)                  | 0.274             | 56 (4.5)                   | 257.0 (0.4)         | 484.0 (0.3)                 | 0.033             |
|                                 | Low level of social capital         | 4 (0.3)                      | 83 (9.9)            | 159 (8.7)                   | 0.303             | 12 (1.0)                   | 52.0 (0.1)          | 100.0 (0.1)                 | 0.570             |
| Cardiovascular risk<br>factors  | Obesity                             | 10 (0.8)                     | 224 (26.9)          | 451 (24.7)                  | 0.228             | 0 (0.0)                    | 205.0 (0.3)         | 467.0 (0.3)                 | 0.272             |
|                                 | Hypertension                        | 0 (0.0)                      | 213 (25.5)          | 467 (25.5)                  | 0.998             | 0 (0.0)                    | 425.0 (0.6)         | 872.0 (0.6)                 | 0.441             |
|                                 | Dyslipidemia                        | 0 (0.0)                      | 374 (44.8)          | 842 (46.0)                  | 0.565             | 0 (0.0)                    | 336.0 (0.5)         | 675.0 (0.5)                 | 0.305             |

- 8 Continuous variables indicate mean (standard deviation), categorical variables indicate the number of case (%).
- 9 P Values were calculated using the Student t tests for continuous variables and the Chi square test for categorical variables.
- 10 Abbreviations: non-TH, non-temporary housing group; TH, temporary housing group; SD, standard deviation.

11 **Supplementary Table S2 (A). Odds ratios of the incidence of diabetes mellitus for men in discrete-time logit models excluding DM events in the**  
 12 **2012 and 2013 survey**  
 13

| <b>Men</b>                     |                            |                    |                          |                    |
|--------------------------------|----------------------------|--------------------|--------------------------|--------------------|
| <b>Age class</b>               | <b>64 years or younger</b> |                    | <b>65 years or older</b> |                    |
|                                | <b>Model 1</b>             | <b>Model 2</b>     | <b>Model 1</b>           | <b>Model 2</b>     |
| <b>Panel samples</b>           | 3583                       | 2988               | 4417                     | 3749               |
| <b>Number</b>                  | 1192                       | 651                | 1359                     | 1028               |
| <b>Event case</b>              | 38                         | 35                 | 52                       | 47                 |
|                                | <b>OR (95% CI)</b>         | <b>OR (95% CI)</b> | <b>OR (95% CI)</b>       | <b>OR (95% CI)</b> |
| <b>TH</b>                      | 2.01 (1.02 - 3.96)         | 1.97 (0.95 - 4.09) | 1.36 (0.70 - 2.62)       | 1.59 (0.79 - 3.21) |
| <b>Age</b>                     | 1.06 (1.02 - 1.11)         | 1.06 (1.01 - 1.11) | 0.97 (0.92 - 1.03)       | 0.98 (0.92 - 1.05) |
| <b>Death of family members</b> |                            | 1.41 (0.52 - 3.83) |                          | 0.91 (0.27 - 3.08) |
| <b>Single (2015)</b>           |                            | 0.61 (0.25 - 1.49) |                          | 0.41 (0.12 - 1.38) |
| <b>Severe economic status</b>  |                            | 1.04 (0.43 - 2.48) |                          | 0.59 (0.26 - 1.33) |
| <b>Unemployment (2015)</b>     |                            | 0.90 (0.40 - 2.02) |                          | 1.11 (0.57 - 2.20) |

14 Abbreviations: OR, Odds ratio; CI, confidence interval; TH, temporary housing group.

15 **Supplementary Table S2 (B). Odds ratios of the incidence of diabetes mellitus for women in discrete-time logit models excluding DM events in**  
 16 **the 2012 and 2013 survey**  
 17

| <b>Women</b>                   |                            |                    |                          |                    |
|--------------------------------|----------------------------|--------------------|--------------------------|--------------------|
| <b>Age class</b>               | <b>64 years or younger</b> |                    | <b>65 years or older</b> |                    |
|                                | <b>Model 1</b>             | <b>Model 2</b>     | <b>Model 1</b>           | <b>Model 2</b>     |
| <b>Panel samples</b>           | 8300                       | 7187               | 6701                     | 5822               |
| <b>Number</b>                  | 1891                       | 1605               | 2042                     | 1581               |
| <b>Event case</b>              | 42                         | 38                 | 52                       | 47                 |
|                                | <b>OR (95% CI)</b>         | <b>OR (95% CI)</b> | <b>OR (95% CI)</b>       | <b>OR (95% CI)</b> |
| <b>TH</b>                      | 1.25 (0.61 - 2.56)         | 1.36 (0.64 - 2.92) | 1.02 (0.53 - 1.95)       | 0.91 (0.44 - 1.86) |
| <b>Age</b>                     | 1.04 (1.01 - 1.08)         | 1.03 (0.99 - 1.07) | 1.08 (1.02 - 1.13)       | 1.08 (1.02 - 1.15) |
| <b>Death of family members</b> |                            | 0.88 (0.26 - 2.95) |                          | 4.87 (2.45 - 9.69) |
| <b>Single (2015)</b>           |                            | 0.81 (0.35 - 1.88) |                          | 0.50 (0.26 - 0.97) |
| <b>Severe economic status</b>  |                            | 0.53 (0.21 - 1.39) |                          | 1.34 (0.58 - 3.13) |
| <b>Unemployment (2015)</b>     |                            | 1.52 (0.75 - 3.05) |                          | 0.80 (0.35 - 1.86) |

18 Abbreviations: OR, Odds ratio; CI, confidence interval; TH, temporary housing group.



19 **Supplementary Table S3 (A). Odds ratios of the incidence of diabetes mellitus for men in discrete-time logit models for all cases**  
 20

| <b>Men</b>                     |                            |                    |                          |                    |
|--------------------------------|----------------------------|--------------------|--------------------------|--------------------|
| <b>Age class</b>               | <b>64 years or younger</b> |                    | <b>65 years or older</b> |                    |
|                                | <b>Model 1</b>             | <b>Model 2</b>     | <b>Model 1</b>           | <b>Model 2</b>     |
| <b>Panel samples</b>           | 2464                       | 2464               | 3254                     | 3254               |
| <b>Number</b>                  | 637                        | 637                | 854                      | 854                |
| <b>Event case</b>              | 52                         | 52                 | 87                       | 87                 |
|                                | <b>OR (95% CI)</b>         | <b>OR (95% CI)</b> | <b>OR (95% CI)</b>       | <b>OR (95% CI)</b> |
| <b>2013 (ref= 2012)</b>        | 0.52 (0.23–1.17)           | 0.52 (0.23–1.17)   | 0.45 (0.25–0.81)         | 0.45 (0.25–0.82)   |
| <b>2014</b>                    | 0.87 (0.43–1.76)           | 0.87 (0.43–1.78)   | 0.55 (0.31–0.97)         | 0.56 (0.31–0.99)   |
| <b>2015</b>                    | 0.64 (0.29–1.38)           | 0.60 (0.26–1.35)   | 0.45 (0.24–0.83)         | 0.37 (0.19–0.74)   |
| <b>TH</b>                      | 1.78 (1.00–3.16)           | 1.82 (1.01–3.28)   | 1.11 (0.68–1.83)         | 1.11 (0.66–1.84)   |
| <b>Age</b>                     | 1.05 (1.02–1.09)           | 1.05 (1.02–1.09)   | 0.99 (0.95–1.04)         | 0.99 (0.95–1.04)   |
| <b>Death of family members</b> |                            | 1.00 (0.40–2.45)   |                          | 0.65 (0.23–1.82)   |
| <b>Single (2015)</b>           |                            | 0.93 (0.47–1.84)   |                          | 0.44 (0.18–1.12)   |
| <b>Severe economic status</b>  |                            | 1.16 (0.62–2.15)   |                          | 1.44 (0.89–2.32)   |
| <b>Unemployment (2015)</b>     |                            | 0.75 (0.38–1.49)   |                          | 1.62 (0.92–2.84)   |

21 Abbreviations: OR, Odds ratio; CI, confidence interval; TH, temporary housing group.  
 22

23 **Supplementary Table S3 (B). Odds ratios of the incidence of diabetes mellitus for women in discrete-time logit models for all cases**  
 24

| <b>Women</b>                   |                            |                    |                          |                    |
|--------------------------------|----------------------------|--------------------|--------------------------|--------------------|
| <b>Age class</b>               | <b>64 years or younger</b> |                    | <b>65 years or older</b> |                    |
|                                | <b>Model 1</b>             | <b>Model 2</b>     | <b>Model 1</b>           | <b>Model 2</b>     |
| <b>Panel samples</b>           | 6061                       | 6061               | 5005                     | 5005               |
| <b>Number</b>                  | 1545                       | 1545               | 1290                     | 1290               |
| <b>Event case</b>              | 64                         | 64                 | 92                       | 92                 |
|                                | <b>OR (95% CI)</b>         | <b>OR (95% CI)</b> | <b>OR (95% CI)</b>       | <b>OR (95% CI)</b> |
| <b>2013 (ref= 2012)</b>        | 0.55 (0.29–1.05)           | 0.55 (0.29–1.05)   | 0.52 (0.29–0.93)         | 0.51 (0.29–0.91)   |
| <b>2014</b>                    | 0.39 (0.19–0.79)           | 0.39 (0.19–0.80)   | 0.48 (0.26–0.87)         | 0.47 (0.26–0.86)   |
| <b>2015</b>                    | 0.40 (0.20–0.81)           | 0.46 (0.21–1.00)   | 0.64 (0.37–1.11)         | 0.83 (0.43–1.60)   |
| <b>TH</b>                      | 1.22 (0.70–2.12)           | 1.24 (0.71–2.18)   | 0.76 (0.46–1.25)         | 0.73 (0.43–1.23)   |
| <b>Age</b>                     | 1.06 (1.03–1.10)           | 1.05 (1.02–1.10)   | 1.03 (0.98–1.07)         | 1.03 (0.98–1.07)   |
| <b>Death of family members</b> |                            | 1.17 (0.52–2.63)   |                          | 2.74 (1.56–4.80)   |
| <b>Single (2015)</b>           |                            | 1.07 (0.59–1.95)   |                          | 0.87 (0.55–1.37)   |
| <b>Severe economic status</b>  |                            | 0.84 (0.48–1.47)   |                          | 0.65 (0.39–1.10)   |
| <b>Unemployment (2015)</b>     |                            | 1.49 (0.85–2.59)   |                          | 0.98 (0.53–1.84)   |

25 Abbreviations: OR, Odds ratio; CI, confidence interval; TH, temporary housing group.

26 **Supplementary Table S4 (A). Odds ratios of the incidence of diabetes mellitus diagnosed two times during surveys for men in discrete-time logit**  
 27 **models stratified age classes**  
 28

| <b>Men</b>                     |                            |                    |                          |                    |
|--------------------------------|----------------------------|--------------------|--------------------------|--------------------|
| <b>Age class</b>               | <b>64 years or younger</b> |                    | <b>65 years or older</b> |                    |
|                                | <b>Model 1</b>             | <b>Model 2</b>     | <b>Model 1</b>           | <b>Model 2</b>     |
| <b>Panel samples</b>           | 3643                       | 2393               | 3466                     | 3044               |
| <b>Number</b>                  | 1134                       | 904                | 1408                     | 1127               |
| <b>Event case</b>              | 55                         | 48                 | 107                      | 89                 |
|                                | <b>OR (95% CI)</b>         | <b>OR (95% CI)</b> | <b>OR (95% CI)</b>       | <b>OR (95% CI)</b> |
| <b>2014 (ref= 2013)</b>        | 0.45 (0.22 - 0.92)         | 0.44 (0.20 - 0.97) | 0.48 (0.30 - 0.77)       | 0.49 (0.29 - 0.84) |
| <b>2015</b>                    | 0.77 (0.42 - 1.43)         | 0.70 (0.34 - 1.41) | 0.54 (0.34 - 0.86)       | 0.59 (0.32 - 1.09) |
| <b>TH</b>                      | 1.80 (1.03 - 3.14)         | 1.63 (0.87 - 3.04) | 0.64 (0.37 - 1.11)       | 0.62 (0.33 - 1.16) |
| <b>Age</b>                     | 1.06 (1.02 - 1.09)         | 1.06 (1.02 - 1.11) | 1.02 (0.98 - 1.06)       | 1.02 (0.98 - 1.07) |
| <b>Death of family members</b> |                            | 1.09 (0.44 - 2.67) |                          | 0.65 (0.25 - 1.65) |
| <b>Single (2015)</b>           |                            | 1.19 (0.61 - 2.32) |                          | 1.40 (0.78 - 2.51) |
| <b>Severe economic status</b>  |                            | 1.37 (0.66 - 2.83) |                          | 0.95 (0.56 - 1.62) |
| <b>Unemployment (2015)</b>     |                            | 1.09 (0.56 - 2.10) |                          | 0.95 (0.58 - 1.56) |

29  
 30 Abbreviations: OR, Odds ratio; CI, confidence interval; TH, temporary housing group.

31 **Supplementary Table S4 (B). Odds ratios of the incidence of diabetes mellitus diagnosed two times during surveys for women in discrete-time logit models**  
 32 **stratified age classes**  
 33

| <b>Women</b>                   |                            |                    |                          |                    |
|--------------------------------|----------------------------|--------------------|--------------------------|--------------------|
| <b>Age class</b>               | <b>64 years or younger</b> |                    | <b>65 years or older</b> |                    |
|                                | <b>Model 1</b>             | <b>Model 2</b>     | <b>Model 1</b>           | <b>Model 2</b>     |
| <b>Panel samples</b>           | 6210                       | 5602               | 5138                     | 4602               |
| <b>Number</b>                  | 2485                       | 2061               | 2036                     | 1607               |
| <b>Event case</b>              | 69                         | 58                 | 94                       | 73                 |
|                                | <b>OR (95% CI)</b>         | <b>OR (95% CI)</b> | <b>OR (95% CI)</b>       | <b>OR (95% CI)</b> |
| <b>2014 (ref= 2013)</b>        | 0.52 (0.29 - 0.92)         | 0.55 (0.30 - 1.03) | 0.47 (0.28 - 0.78)       | 0.41 (0.22 - 0.75) |
| <b>2015</b>                    | 0.45 (0.25 - 0.82)         | 0.42 (0.20 - 0.87) | 0.50 (0.30 - 0.83)       | 0.48 (0.25 - 0.92) |
| <b>TH</b>                      | 1.03 (0.58 - 1.81)         | 1.00 (0.53 - 1.88) | 0.70 (0.41 - 1.17)       | 0.42 (0.21 - 0.84) |
| <b>Age</b>                     | 1.03 (1.00 - 1.06)         | 1.03 (1.00 - 1.07) | 1.02 (0.98 - 1.06)       | 1.04 (0.99 - 1.09) |
| <b>Death of family members</b> |                            | 1.29 (0.54 - 3.08) |                          | 1.43 (0.67 - 3.06) |
| <b>Single (2015)</b>           |                            | 0.72 (0.36 - 1.44) |                          | 1.12 (0.68 - 1.82) |
| <b>Severe economic status</b>  |                            | 1.04 (0.57 - 1.91) |                          | 1.22 (0.69 - 2.16) |
| <b>Unemployment (2015)</b>     |                            | 1.20 (0.69 - 2.09) |                          | 1.27 (0.57 - 2.81) |

34  
 35 Abbreviations: OR, Odds ratio; CI, confidence interval; TH, temporary housing group.

36 Supplementary Table S5 (A). Baseline characteristics of participants in the 2012 survey (n=7,491)

|                                     |                                            | Men (n=2697) |                     |                             |         | Women (n=4794) |                      |                             |                     |         |
|-------------------------------------|--------------------------------------------|--------------|---------------------|-----------------------------|---------|----------------|----------------------|-----------------------------|---------------------|---------|
|                                     |                                            | Missing      | TH group<br>(n=853) | Non-TH<br>group<br>(n=1844) |         | Missing        | TH group<br>(n=1519) | Non-TH<br>group<br>(n=3275) |                     |         |
|                                     |                                            | n (%)        | Mean (SD)/<br>n (%) | Mean (SD)/<br>n (%)         | P Value | n (%)          | Mean<br>(SD)/<br>(%) | n                           | Mean (SD)/<br>n (%) | P-value |
| <b>Age</b>                          | <b>Age (yr)</b>                            | 392 (14.5)   | 62.7 (13.4)         | 65.1 (13.4)                 | <0.001  | 589 (16.5)     | 61.4 (14.2)          | 62.0 (13.2)                 | 0.203               |         |
| <b>Disaster-related experiences</b> | <b>Death of family members</b>             | 945 (35.0)   | 87 (16.1)           | 83 (6.8)                    | <0.001  | 1494 (41.7)    | 157 (15.6)           | 144 (6.3)                   | <0.001              |         |
| <b>Marital status</b>               | <b>Single (2015)</b>                       | 950 (35.2)   | 162 (30.1)          | 215 (17.8)                  | <0.001  | 1495 (41.8)    | 385 (38.3)           | 655 (28.6)                  | <0.001              |         |
| <b>Life style</b>                   | <b>Current smokers</b>                     | 392 (14.5)   | 228 (31.8)          | 393 (24.8)                  | <0.001  | 589 (16.5)     | 87 (6.7)             | 150 (5.1)                   | 0.037               |         |
|                                     | <b>Drinkers</b>                            | 392 (14.5)   | 481 (67.0)          | 987 (62.2)                  | 0.027   | 589 (16.5)     | 185 (14.4)           | 415 (14.2)                  | 0.918               |         |
|                                     | <b>Low physical activity</b>               | 398 (14.8)   | 271 (37.8)          | 462 (29.2)                  | <0.001  | 615 (17.2)     | 407 (31.8)           | 673 (23.2)                  | 0.001               |         |
|                                     | <b>Small number of meals (&lt;3 times)</b> | 413 (15.3)   | 67 (9.4)            | 85 (5.4)                    | <0.001  | 627 (17.5)     | 73 (5.7)             | 131 (4.5)                   | 0.103               |         |
|                                     | <b>Poor dietary intake</b>                 | 392 (14.5)   | 392 (54.6)          | 696 (43.9)                  | <0.001  | 587 (16.4)     | 450 (34.9)           | 912 (31.3)                  | 0.021               |         |
| <b>Socioeconomic status</b>         | <b>Severe economic status</b>              | 399 (14.8)   | 403 (56.3)          | 643 (40.6)                  | <0.001  | 602 (16.8)     | 698 (54.4)           | 1109 (38.1)                 | <0.001              |         |
|                                     | <b>Unemployment (2015)</b>                 | 961 (35.6)   | 278 (52.3)          | 633 (52.6)                  | 0.902   | 1515 (42.3)    | 671 (67.1)           | 1524 (66.9)                 | 0.898               |         |
| <b>Psychological factors</b>        | <b>Psychological distress</b>              | 418 (15.5)   | 228 (32.2)          | 350 (22.3)                  | <0.001  | 652 (18.2)     | 545 (42.9)           | 949 (33.0)                  | <0.001              |         |
|                                     | <b>Insomnia</b>                            | 421 (15.6)   | 166 (23.4)          | 253 (16.1)                  | <0.001  | 649 (18.1)     | 434 (34.3)           | 751 (26.1)                  | <0.001              |         |
| <b>Social factors</b>               | <b>Low level of social network</b>         | 434 (16.1)   | 322 (45.5)          | 688 (44.2)                  | 0.556   | 672 (18.8)     | 557 (43.9)           | 1265 (44.3)                 | 0.813               |         |
|                                     | <b>Low level of social capital</b>         | 401 (14.9)   | 76 (10.6)           | 173 (10.9)                  | 0.835   | 610 (17.0)     | 126 (9.8)            | 275 (9.5)                   | 0.721               |         |
| <b>Cardiovascular risk factors</b>  | <b>Obesity</b>                             | 392 (14.5)   | 283 (39.4)          | 557 (35.1)                  | 0.046   | 596 (16.6)     | 399 (31.0)           | 822 (28.2)                  | 0.069               |         |
|                                     | <b>Hypertension</b>                        | 395 (14.6)   | 365 (50.9)          | 852 (53.8)                  | 0.205   | 599 (16.7)     | 564 (43.9)           | 1221 (41.9)                 | 0.232               |         |
|                                     | <b>Dyslipidemia</b>                        | 395 (14.6)   | 256 (35.7)          | 490 (30.9)                  | 0.023   | 599 (16.7)     | 605 (47.1)           | 1385 (47.6)                 | 0.783               |         |

37 Continuous variables indicate mean (standard deviation), categorical variables indicate the number of case (%).

38 P-values were calculated using the Student t tests for continuous variables and the Chi square test for categorical variables.

39 Abbreviations: non-TH, non-temporary housing group; TH, temporary housing group; SD, standard deviation.

40 Supplementary Table S5 (B). Baseline characteristics of participants in the 2013 survey (n=7,491)

|                                     |                                            | Men (n=2697) |                     |                             |         | Women (n=4794) |                      |                             |                     |         |
|-------------------------------------|--------------------------------------------|--------------|---------------------|-----------------------------|---------|----------------|----------------------|-----------------------------|---------------------|---------|
|                                     |                                            | Missing      | TH group<br>(n=853) | Non-TH<br>group<br>(n=1844) |         | Missing        | TH group<br>(n=1519) | Non-TH<br>group<br>(n=3275) |                     |         |
|                                     |                                            | n (%)        | Mean (SD)/<br>n (%) | Mean (SD)/<br>n (%)         | P Value | n (%)          | Mean<br>(SD)/<br>(%) | n                           | Mean (SD)/<br>n (%) | P-value |
| <b>Age</b>                          | <b>Age (yr)</b>                            | 550 (20.4)   | 64.0 (13.0)         | 66.7 (12.6)                 | <0.001  | 867 (24.2)     | 63.0 (13.8)          |                             | 63.4 (12.8)         | 0.381   |
| <b>Disaster-related experiences</b> | <b>Death of family members</b>             | 954 (35.4)   | 76 (16.0)           | 87 (6.9)                    | <0.001  | 1482 (41.4)    | 141 (15.6)           |                             | 156 (6.5)           | <0.001  |
| <b>Marital status</b>               | <b>Single (2015)</b>                       | 958 (35.5)   | 135 (28.5)          | 232 (18.3)                  | <0.001  | 1483 (41.4)    | 363 (40.1)           |                             | 680 (28.3)          | <0.001  |
| <b>Life style</b>                   | <b>Current smokers</b>                     | 550 (20.4)   | 393 (67.4)          | 939 (60.0)                  | <0.001  | 867 (24.2)     | 71 (6.7)             |                             | 127 (4.4)           | 0.004   |
|                                     | <b>Drinkers</b>                            | 550 (20.4)   | 393 (67.4)          | 939 (60.0)                  | 0.002   | 867 (24.2)     | 0 (92400.0)          |                             | 0 (247200.0)        | 0.619   |
|                                     | <b>Low physical activity</b>               | 551 (20.4)   | 155 (26.6)          | 285 (18.2)                  | <0.001  | 854 (23.9)     | 207 (19.3)           |                             | 362 (12.6)          | <0.001  |
|                                     | <b>Small number of meals (&lt;3 times)</b> | 572 (21.2)   | 49 (8.5)            | 87 (5.6)                    | 0.014   | 912 (25.5)     | 56 (5.3)             |                             | 105 (3.7)           | 0.024   |
|                                     | <b>Poor dietary intake</b>                 | 556 (20.6)   | 270 (46.2)          | 604 (38.8)                  | 0.002   | 869 (24.3)     | 331 (31.1)           |                             | 733 (25.6)          | 0.001   |
| <b>Socioeconomic status</b>         | <b>Severe economic status</b>              | 545 (20.2)   | 340 (58.1)          | 585 (37.3)                  | <0.001  | 849 (23.7)     | 597 (55.8)           |                             | 983 (34.2)          | <0.001  |
|                                     | <b>Unemployment (2015)</b>                 | 972 (36.0)   | 234 (50.4)          | 673 (53.4)                  | 0.278   | 1501 (41.9)    | 591 (65.7)           |                             | 1618 (67.6)         | 0.315   |
| <b>Psychological factors</b>        | <b>Psychological distress</b>              | 567 (21.0)   | 160 (27.9)          | 331 (21.3)                  | 0.001   | 895 (25.0)     | 429 (40.9)           |                             | 831 (29.1)          | <0.001  |
|                                     | <b>Insomnia</b>                            | 577 (21.4)   | 134 (23.1)          | 256 (16.6)                  | 0.001   | 888 (24.8)     | 353 (33.4)           |                             | 726 (25.5)          | <0.001  |
| <b>Social factors</b>               | <b>Low level of social network</b>         | 581 (21.5)   | 214 (37.3)          | 534 (34.6)                  | 0.257   | 907 (25.3)     | 410 (38.9)           |                             | 1014 (35.8)         | 0.074   |
|                                     | <b>Low level of social capital</b>         | 561 (20.8)   | 62 (10.7)           | 188 (12.1)                  | 0.355   | 884 (24.7)     | 101 (9.5)            |                             | 318 (11.2)          | 0.150   |
| <b>Cardiovascular risk factors</b>  | <b>Obesity</b>                             | 550 (20.4)   | 241 (41.3)          | 519 (33.2)                  | <0.001  | 872 (24.4)     | 324 (30.5)           |                             | 811 (28.4)          | 0.187   |
|                                     | <b>Hypertension</b>                        | 545 (20.2)   | 304 (52.0)          | 871 (55.6)                  | 0.134   | 845 (23.6)     | 489 (45.7)           |                             | 1207 (41.9)         | 0.033   |
|                                     | <b>Dyslipidemia</b>                        | 545 (20.2)   | 231 (39.5)          | 564 (36.0)                  | 0.135   | 845 (23.6)     | 576 (53.8)           |                             | 1563 (54.3)         | 0.797   |

41 Continuous variables indicate mean (standard deviation), categorical variables indicate the number of case (%).

42 P-values were calculated using the Student t tests for continuous variables and the Chi square test for categorical variables.

43 Abbreviations: non-TH, non-temporary housing group; TH, temporary housing group; SD, standard deviation.



44 Supplementary Table S5 (C). Baseline characteristics of participants in the 2014 survey (n=7,491)

|                                     |                                            | Men (n=2697) |                     |                             |         | Women (n=4794) |                      |                             |                     |         |
|-------------------------------------|--------------------------------------------|--------------|---------------------|-----------------------------|---------|----------------|----------------------|-----------------------------|---------------------|---------|
|                                     |                                            | Missing      | TH group<br>(n=853) | Non-TH<br>group<br>(n=1844) |         | Missing        | TH group<br>(n=1519) | Non-TH<br>group<br>(n=3275) |                     |         |
|                                     |                                            | n (%)        | Mean (SD)/<br>n (%) | Mean (SD)/<br>n (%)         | P Value | n (%)          | Mean<br>(SD)/<br>(%) | n                           | Mean (SD)/<br>n (%) | P-value |
| <b>Age</b>                          | <b>Age (yr)</b>                            | 654 (24.2)   | 64.0 (13.0)         | 66.7 (12.6)                 | <0.001  | 1060 (29.6)    | 63.0 (13.8)          |                             | 63.4 (12.8)         | 0.381   |
| <b>Disaster-related experiences</b> | <b>Death of family members</b>             | 896 (33.2)   | 66 (15.9)           | 101 (7.3)                   | <0.001  | 1455 (40.6)    | 120 (15.4)           |                             | 180 (7.0)           | <0.001  |
| <b>Marital status</b>               | <b>Single (2015)</b>                       | 901 (33.4)   | 127 (30.6)          | 258 (18.7)                  | <0.001  | 1455 (40.6)    | 327 (41.9)           |                             | 729 (28.5)          | <0.001  |
| <b>Life style</b>                   | <b>Current smokers</b>                     | 654 (24.2)   | 134 (28.6)          | 341 (21.7)                  | 0.002   | 1060 (29.6)    | 52 (6.0)             |                             | 135 (4.7)           | 0.127   |
|                                     | <b>Drinkers</b>                            | 654 (24.2)   | 297 (63.5)          | 966 (61.3)                  | 0.405   | 1060 (29.6)    | 113 (13.0)           |                             | 387 (13.5)          | 0.725   |
|                                     | <b>Low physical activity</b>               | 629 (23.3)   | 112 (23.6)          | 268 (16.8)                  | 0.001   | 1036 (28.9)    | 152 (17.4)           |                             | 306 (10.6)          | <0.001  |
|                                     | <b>Small number of meals (&lt;3 times)</b> | 643 (23.8)   | 48 (10.3)           | 86 (5.4)                    | <0.001  | 1064 (29.7)    | 49 (5.7)             |                             | 109 (3.8)           | 0.018   |
|                                     | <b>Poor dietary intake</b>                 | 658 (24.4)   | 212 (45.5)          | 611 (38.8)                  | 0.010   | 1094 (30.6)    | 264 (30.5)           |                             | 772 (27.2)          | 0.059   |
| <b>Socioeconomic status</b>         | <b>Severe economic status</b>              | 628 (23.3)   | 266 (56.1)          | 617 (38.7)                  | <0.001  | 1035 (28.9)    | 484 (55.3)           |                             | 1018 (35.3)         | <0.001  |
|                                     | <b>Unemployment (2015)</b>                 | 919 (34.1)   | 198 (48.9)          | 716 (52.1)                  | 0.249   | 1475 (41.2)    | 518 (66.7)           |                             | 1697 (66.8)         | 0.962   |
| <b>Psychological factors</b>        | <b>Psychological distress</b>              | 641 (23.8)   | 133 (28.2)          | 275 (17.4)                  | <0.001  | 1078 (30.1)    | 292 (33.7)           |                             | 761 (26.7)          | <0.001  |
|                                     | <b>Insomnia</b>                            | 652 (24.2)   | 112 (24.0)          | 228 (14.4)                  | <0.001  | 1076 (30.1)    | 258 (29.9)           |                             | 651 (22.8)          | <0.001  |
| <b>Social factors</b>               | <b>Low level of social network</b>         | 675 (25.0)   | 183 (39.6)          | 521 (33.4)                  | 0.014   | 1110 (31.0)    | 322 (37.8)           |                             | 954 (33.7)          | 0.025   |
|                                     | <b>Low level of social capital</b>         | 634 (23.5)   | 69 (14.6)           | 188 (11.8)                  | 0.110   | 1054 (29.4)    | 99 (11.4)            |                             | 282 (9.8)           | 0.184   |
| <b>Cardiovascular risk factors</b>  | <b>Obesity</b>                             | 654 (24.2)   | 181 (38.7)          | 538 (34.2)                  | 0.072   | 1068 (29.8)    | 283 (32.8)           |                             | 823 (28.8)          | 0.024   |
|                                     | <b>Hypertension</b>                        | 627 (23.2)   | 223 (46.9)          | 879 (55.1)                  | 0.002   | 1031 (28.8)    | 410 (46.9)           |                             | 1258 (43.6)         | 0.085   |
|                                     | <b>Dyslipidemia</b>                        | 627 (23.2)   | 198 (41.7)          | 605 (37.9)                  | 0.141   | 1031 (28.8)    | 486 (55.5)           |                             | 1535 (53.2)         | 0.214   |

45 Continuous variables indicate mean (standard deviation), categorical variables indicate the number of case (%).

46 P-values were calculated using the Student t tests for continuous variables and the Chi square test for categorical variables.

47 Abbreviations: non-TH, non-temporary housing group; TH, temporary housing group; SD, standard deviation.

48 Supplementary Table S5 (D). Baseline characteristics of participants in the 2015 survey (n=7,491)

|                                     |                                            | Men (n=2697) |                     |                             |         | Women (n=4794) |                      |                             |                     |         |
|-------------------------------------|--------------------------------------------|--------------|---------------------|-----------------------------|---------|----------------|----------------------|-----------------------------|---------------------|---------|
|                                     |                                            | Missing      | TH group<br>(n=853) | Non-TH<br>group<br>(n=1844) |         | Missing        | TH group<br>(n=1519) | Non-TH<br>group<br>(n=3275) |                     |         |
|                                     |                                            | n (%)        | Mean (SD)/<br>n (%) | Mean (SD)/<br>n (%)         | P Value | n (%)          | Mean<br>(SD)/<br>(%) | n                           | Mean (SD)/<br>n (%) | P-value |
| <b>Age</b>                          | <b>Age (yr)</b>                            | 713 (26.4)   | 64.8 (12.4)         | 68.1 (12.4)                 | <0.001  | 1127 (31.5)    | 65.0 (13.3)          |                             | 65.1 (12.2)         | 0.820   |
| <b>Disaster-related experiences</b> | <b>Death of family members</b>             | 689 (25.5)   | 67 (17.9)           | 126 (7.7)                   | <0.001  | 1093 (30.5)    | 110 (15.2)           |                             | 220 (7.4)           | <0.001  |
| <b>Marital status</b>               | <b>Single (2015)</b>                       | 695 (25.8)   | 126 (33.7)          | 313 (19.2)                  | <0.001  | 1093 (30.5)    | 312 (43.2)           |                             | 877 (29.4)          | <0.001  |
| <b>Life style</b>                   | <b>Current smokers</b>                     | 713 (26.4)   | 99 (26.7)           | 356 (22.1)                  | 0.057   | 1127 (31.5)    | 45 (6.3)             |                             | 126 (4.3)           | 0.021   |
|                                     | <b>Drinkers</b>                            | 713 (26.4)   | 236 (63.6)          | 976 (60.5)                  | 0.269   | 1127 (31.5)    | 109 (15.3)           |                             | 390 (13.2)          | 0.150   |
|                                     | <b>Low physical activity</b>               | 897 (33.3)   | 82 (23.8)           | 228 (15.7)                  | <0.001  | 1461 (40.8)    | 120 (18.2)           |                             | 249 (9.3)           | <0.001  |
|                                     | <b>Small number of meals (&lt;3 times)</b> | 713 (26.4)   | 45 (12.1)           | 83 (5.1)                    | <0.001  | 1118 (31.2)    | 36 (5.0)             |                             | 95 (3.2)            | 0.018   |
|                                     | <b>Poor dietary intake</b>                 | 719 (26.7)   | 191 (51.5)          | 596 (37.1)                  | <0.001  | 1128 (31.5)    | 212 (29.8)           |                             | 714 (24.2)          | 0.002   |
| <b>Socioeconomic status</b>         | <b>Severe economic status</b>              | 694 (25.7)   | 365 (97.3)          | 1568 (96.3)                 | 0.333   | 1096 (30.6)    | 709 (98.1)           |                             | 2885 (97.0)         | 0.112   |
|                                     | <b>Unemployment (2015)</b>                 | 714 (26.5)   | 178 (48.8)          | 841 (52.0)                  | 0.268   | 1119 (31.3)    | 472 (65.8)           |                             | 1941 (65.6)         | 0.915   |
| <b>Psychological factors</b>        | <b>Psychological distress</b>              | 703 (26.1)   | 100 (26.8)          | 295 (18.2)                  | <0.001  | 1128 (31.5)    | 254 (35.7)           |                             | 788 (26.7)          | <0.001  |
|                                     | <b>Insomnia</b>                            | 710 (26.3)   | 71 (19.1)           | 231 (14.3)                  | 0.019   | 1127 (31.5)    | 217 (30.3)           |                             | 651 (22.1)          | <0.001  |
| <b>Social factors</b>               | <b>Low level of social network</b>         | 936 (34.7)   | 142 (42.1)          | 478 (33.6)                  | 0.003   | 1533 (42.8)    | 246 (38.5)           |                             | 891 (34.0)          | 0.032   |
|                                     | <b>Low level of social capital</b>         | 695 (25.8)   | 48 (12.8)           | 202 (12.4)                  | 0.822   | 1130 (31.6)    | 73 (10.2)            |                             | 291 (9.9)           | 0.795   |
| <b>Cardiovascular risk factors</b>  | <b>Obesity</b>                             | 713 (26.4)   | 157 (42.3)          | 554 (34.3)                  | 0.004   | 1131 (31.6)    | 215 (30.1)           |                             | 848 (28.8)          | 0.474   |
|                                     | <b>Hypertension</b>                        | 687 (25.5)   | 182 (48.4)          | 931 (57.0)                  | 0.003   | 1091 (30.5)    | 345 (47.7)           |                             | 1315 (44.1)         | 0.082   |
|                                     | <b>Dyslipidemia</b>                        | 687 (25.5)   | 161 (42.8)          | 577 (35.3)                  | 0.006   | 1091 (30.5)    | 366 (50.6)           |                             | 1486 (49.9)         | 0.715   |

49 Continuous variables indicate mean (standard deviation), categorical variables indicate the number of case (%).

50 P-values were calculated using the Student t tests for continuous variables and the Chi square test for categorical variables.

51 Abbreviations: non-TH, non-temporary housing group; TH, temporary housing group; SD, standard deviation

52 **Supplementary Table S6. The number of participants and the number of events in categorical**  
 53 **variables**  
 54

|                              |                                             | Men (n=2698) |              |         | Women (n=4794) |              |         |
|------------------------------|---------------------------------------------|--------------|--------------|---------|----------------|--------------|---------|
|                              |                                             | Missing      | Participants | Event   | Missing        | Participants | Event   |
|                              |                                             | n (%)        | (n=2698)     | (n=222) | n (%)          | (n=4794)     | (n=238) |
|                              |                                             |              | n            | n       |                | n            | n       |
| <b>Living conditions</b>     | <b>Temporary housing group</b>              | 0 (0.0)      | 853          | 81      | 0 (0.0)        | 1519         | 77      |
|                              | <b>Non-temporary housing group</b>          |              | 1844         | 141     |                | 3275         | 161     |
| <b>Disaster influence</b>    | <b>Death of family members</b>              | 685 (25.4)   | 194          | 14      | 1079 (22.5)    | 333          | 29      |
|                              | <b>No death of family members</b>           |              | 1818         | 167     |                | 3382         | 167     |
| <b>Marital status</b>        | <b>Single (2015)</b>                        | 691 (25.6)   | 440          | 30      | 1079 (22.5)    | 1193         | 63      |
|                              | <b>Married</b>                              |              | 1566         | 151     |                | 2522         | 133     |
| <b>Life style</b>            | <b>Current smokers</b>                      | 0 (0.0)      | 782          | 69      | 0 (0.0)        | 309          | 10      |
|                              | <b>Non-current smokers</b>                  |              | 1915         | 153     |                | 4485         | 228     |
|                              | <b>Drinkers</b>                             | 0 (0.0)      | 1737         | 145     | 0 (0.0)        | 680          | 29      |
|                              | <b>Non-drinkers</b>                         |              | 960          | 77      |                | 4114         | 209     |
|                              | <b>Low physical activity</b>                | 14 (0.5)     | 1622         | 132     | 38 (0.8)       | 3233         | 170     |
|                              | <b>Normal physical activity</b>             |              | 1061         | 88      |                | 1523         | 68      |
|                              | <b>Small number of meals (&lt; 3 times)</b> | 19 (0.7)     | 181          | 8       | 25 (0.5)       | 240          | 2       |
|                              | <b>Normal number of meals (≥3 times)</b>    |              | 2497         | 213     |                | 4529         | 235     |
|                              | <b>Poor dietary intake</b>                  | 0 (0.0)      | 1131         | 80      | 0 (0.0)        | 1513         | 64      |
|                              | <b>Good dietary intake</b>                  |              | 1566         | 142     |                | 3281         | 174     |
| <b>Socioeconomic status</b>  | <b>Severe economic status</b>               | 9 (0.3)      | 1421         | 124     | 11 (0.2)       | 2420         | 111     |
|                              | <b>General economic status</b>              |              | 1267         | 98      |                | 2363         | 126     |
|                              | <b>Unemployment (2015)</b>                  | 710 (26.3)   | 1023         | 101     | 1105 (23.0)    | 2425         | 148     |
|                              | <b>Employment</b>                           |              | 964          | 80      |                | 1264         | 47      |
| <b>Psychological factors</b> | <b>Psychological distress</b>               | 27 (1.0)     | 969          | 76      | 101 (2.1)      | 2199         | 99      |
|                              | <b>No psychological distress</b>            |              | 1701         | 143     |                | 2494         | 133     |
|                              | <b>Insomnia</b>                             | 29 (1.1)     | 682          | 52      | 78 (1.6)       | 1814         | 86      |
|                              | <b>No insomnia</b>                          |              | 1986         | 169     |                | 2902         | 145     |
| <b>Social factors</b>        | <b>Low level of social network</b>          | 56 (2.1)     | 1111         | 85      | 102 (2.1)      | 1890         | 99      |
|                              | <b>High level of social network</b>         |              | 1530         | 131     |                | 2802         | 134     |

|                                        |                                         |         |      |     |          |      |     |
|----------------------------------------|-----------------------------------------|---------|------|-----|----------|------|-----|
| <b>Cardiovascular<br/>risk factors</b> | <b>Low level of<br/>social capital</b>  | 6 (0.2) | 285  | 25  | 16 (0.3) | 394  | 22  |
|                                        | <b>High level of<br/>social capital</b> |         | 2406 | 195 |          | 4384 | 214 |
|                                        | <b>Obesity</b>                          | 0 (0.0) | 981  | 87  | 10 (0.2) | 1347 | 98  |
|                                        | <b>No Obesity</b>                       |         | 1716 | 135 |          | 3437 | 140 |
|                                        | <b>Hypertension</b>                     | 0 (0.0) | 1355 | 144 | 0 (0.0)  | 1977 | 154 |
|                                        | <b>No hypertension</b>                  |         | 1342 | 78  |          | 2817 | 84  |
|                                        | <b>Dyslipidemia</b>                     | 0 (0.0) | 905  | 87  | 0 (0.0)  | 2227 | 142 |
|                                        | <b>No dyslipidemia</b>                  |         | 1792 | 135 |          | 2567 | 96  |

---

55 Variables indicate the number of case.

56

57

58

59
